# Supplementary material for: Combustion of a Solid Recovered Fuel (SRF) Produced from the Polymeric Fraction of Automotive Shredder Residue (ASR)
Source: MDPI journal article supplement (doi:10.3390/polym13213807), 2021-11-03
Supplement: s1 [file s1]

## Supplementary Material: Combustion of a Solid Recovered Fuel (SRF) Produced from the Polymeric Fraction of Automotive Shredder Residue (ASR)

Esther Acha, Alexander Lopez-Urionabarrenechea, Clara Delgado, Lander Martinez-Canibano, Borja Baltasar Perez-Martinez, Adriana Serras-Malillos, Blanca María Caballero, Lucía Unamunzaga, Elena Dosal, Noelia Montes, Jon Barrenetxea-Arando

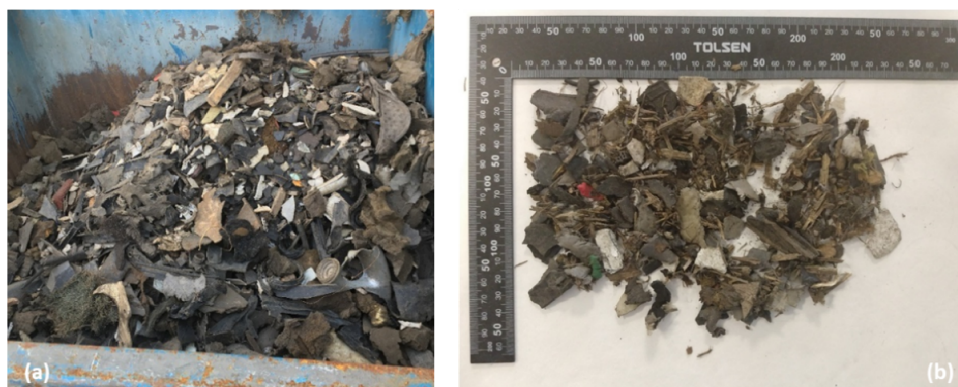

**Figure S1.** SRF prepared from the heavy fraction of ASR: (a) output of the XRT sorting line; (b) test sample.

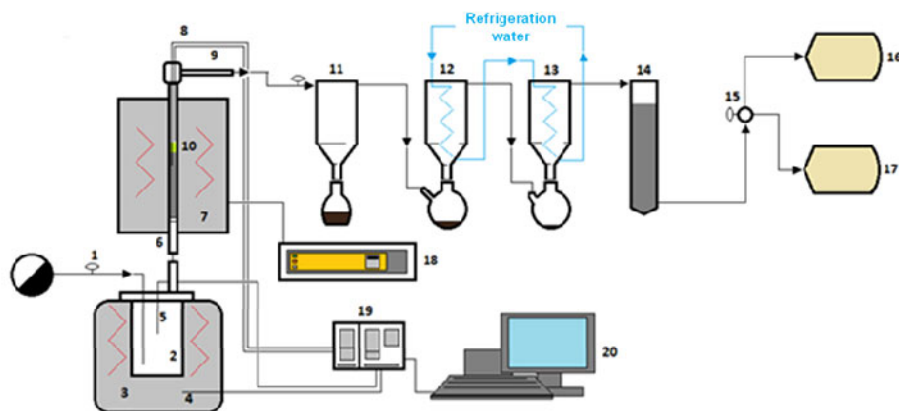

**Figure S2.** Process flow diagram of the SRF combustion pilot-plant.

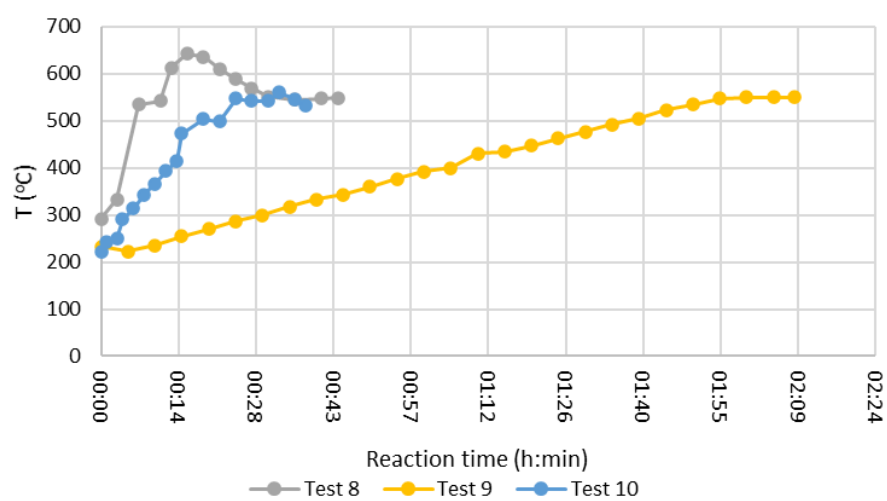

**Figure S3.** Variation of temperature recorded in the tank-reactor: Test 8 feeding oxygen, Test 9 feeding air and Test 10 feeding enriched air.

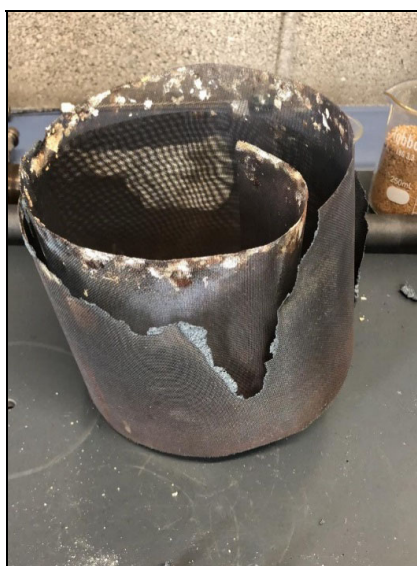

**Figure S4.** Condition of the basket in which the sample was placed after Test 8 feeding pure oxygen.

**Table S1.** Pictures of the collected ashes in the combustion tests.

|                                                                                     |                                                                                      |
|-------------------------------------------------------------------------------------|--------------------------------------------------------------------------------------|
| TEST 1                                                                              | TEST 2                                                                               |
|    |    |
| TEST 3                                                                              | TEST 4                                                                               |
|   |   |
| TEST 5                                                                              | TEST 6                                                                               |
|  |  |



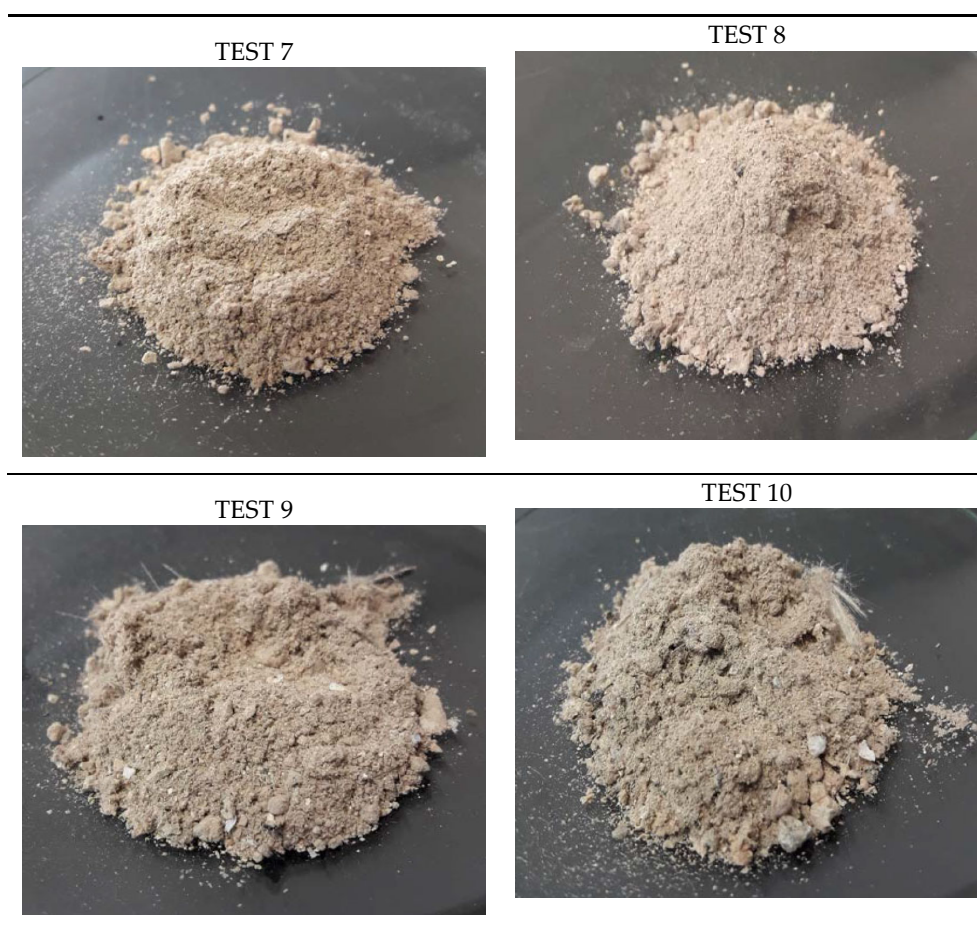

**Table S2.** Upper calibration limits of the equipment used in the online composition analysis of the vapours.

| Compound         | Upper calibration limit |                    |
|------------------|-------------------------|--------------------|
| O <sub>2</sub>   | 25                      | vol.%              |
| H <sub>2</sub> O | 25                      | vol.%              |
| CO <sub>2</sub>  | 10                      | vol.%              |
| CO               | 2                       | vol.%              |
| SO <sub>2</sub>  | 200                     | ppm <sub>v</sub>   |
| NH <sub>3</sub>  | 20                      | ppm <sub>v</sub>   |
| HCl              | 10                      | ppm <sub>v</sub>   |
| HCl              | 10                      | ppm <sub>v</sub>   |
| HF               | 17                      | ppm <sub>v</sub>   |
| NO <sub>x</sub>  | 200                     | mg/Nm <sup>3</sup> |
| TOC              | 50                      | mg/Nm <sup>3</sup> |

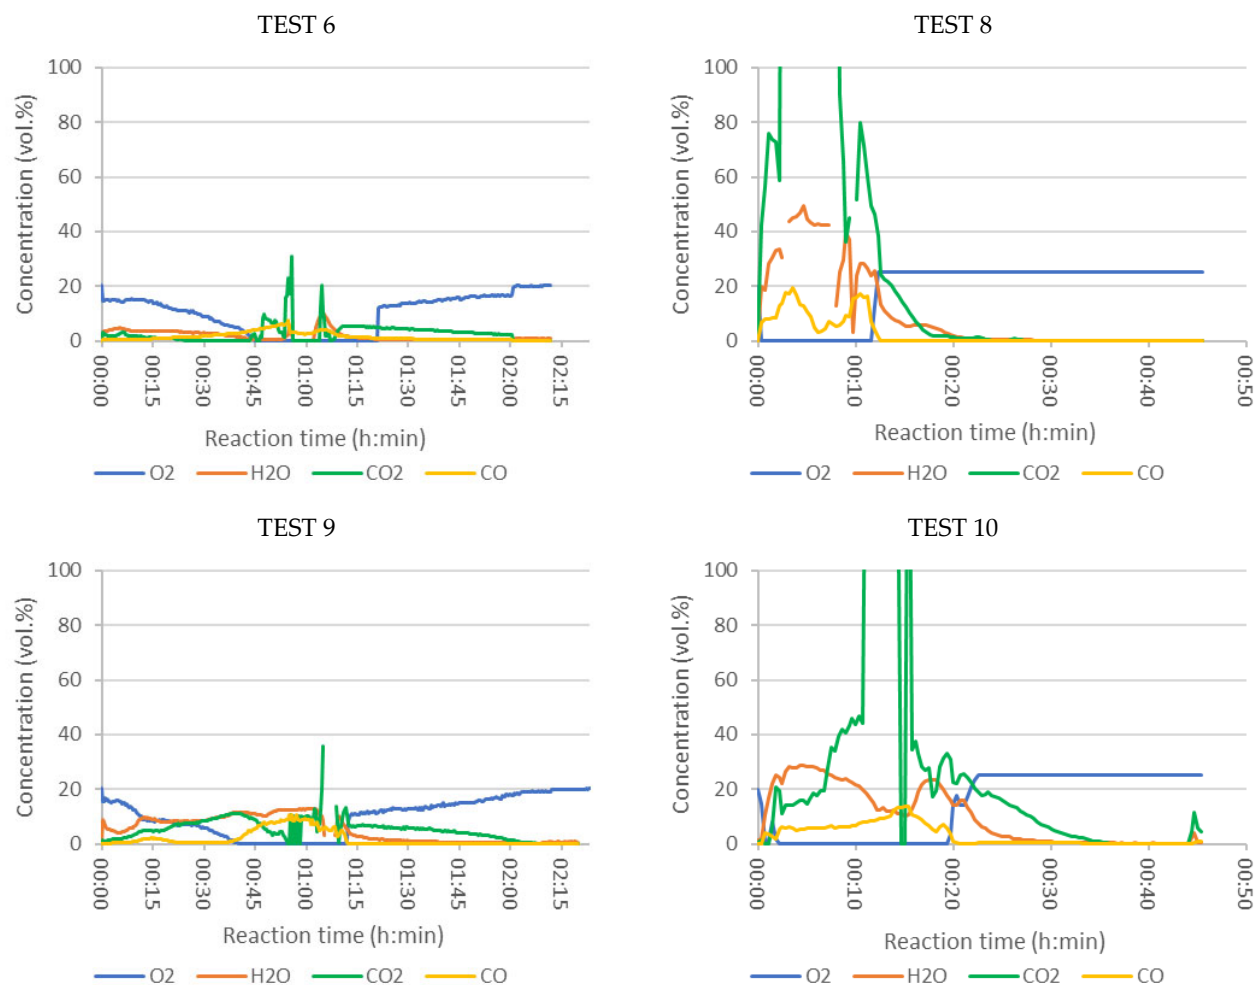

**Figure S5.** Concentration of O<sub>2</sub>, H<sub>2</sub>O, CO<sub>2</sub> and CO (vol.%) in the flue gases of combustion of SRF: Test 6 (air, 550 °C), Test 8 (oxygen, 900 °C), Test 9 (air, 900 °C) and Test 10 (enriched air, 900 °C).
